**Supplemental Table 1.****Univariable zero-inflated negative binomial models of decayed-missing-filled-teeth****(DMFT) score.**

| <b>Parameter</b>                    | <b>N</b> | <b>Overall Mean Ratio* (95%<br/>CI)</b> | <b>P-Value</b> |
|-------------------------------------|----------|-----------------------------------------|----------------|
| PHIV infection                      | 335      | 1.04 (0.84, 1.29)                       | 0.70           |
| Age (vs <14 years)                  | 335      |                                         |                |
| 14-16 years                         |          | 1.29 (0.99, 1.67)                       | 0.06           |
| 17-18 years                         |          | 1.64 (1.24, 2.17)                       | 0.001          |
| ≥19 years                           |          | 2.05 (1.54, 2.73)                       | <0.001         |
| Female                              | 335      | 1.16 (0.94, 1.43)                       | 0.16           |
| Black (vs non-black)                | 335      | 0.85 (0.68, 1.05)                       | 0.12           |
| Hispanic (vs non-Hispanic)          | 335      | 1.17 (0.94, 1.45)                       | 0.15           |
| Tanner stage (vs 1-3)               | 335      |                                         |                |
| Stage 4                             |          | 1.10 (0.79, 1.54)                       | 0.56           |
| Stage 5                             |          | 1.54 (1.14, 2.06)                       | 0.004          |
| Caregiver is biological parent      | 335      | 1.17 (0.95, 1.45)                       | 0.13           |
| Caregiver is high school graduate   | 332      | 0.91 (0.73, 1.14)                       | 0.42           |
| Caregiver income <\$20,001 annually | 327      | 1.26 (1.02, 1.55)                       | 0.03           |
| Reported ever having sex            | 328      | 1.49 (1.22, 1.82)                       | <0.001         |
| Reported ever having oral sex       | 328      | 1.40 (1.14, 1.71)                       | 0.001          |
| Drank alcohol in past 3 months      | 328      | 1.65 (1.32, 2.07)                       | <0.001         |

|                                                         |     |                   |        |
|---------------------------------------------------------|-----|-------------------|--------|
| Smoked cigarettes in past 3 months                      | 326 | 1.41 (1.02, 1.95) | 0.04   |
| Used marijuana in past 3 months                         | 328 | 1.67 (1.34, 2.08) | <0.001 |
| Brushed teeth (vs $\geq 2$ times/day)                   | 335 |                   |        |
| <1 time/day                                             |     | 0.84 (0.53, 1.31) | 0.44   |
| 1 time/day                                              |     | 0.97 (0.79, 1.20) | 0.80   |
| Flossed teeth (vs $\geq 2$ times/day)                   | 335 |                   |        |
| <1 time/day                                             |     | 0.92 (0.60, 1.43) | 0.72   |
| 1 time/day                                              |     | 0.80 (0.43, 1.50) | 0.49   |
| Have no regular source of dental care                   | 330 | 1.26 (0.99, 1.59) | 0.06   |
| Did not have teeth cleaned in past year                 | 334 | 1.01 (0.82, 1.25) | 0.94   |
| Meal or snack (vs 1-3 times/day)                        | 335 |                   |        |
| 4 times/day                                             |     | 0.88 (0.61, 1.25) | 0.47   |
| $\geq 5$ times/day                                      |     | 0.97 (0.71, 1.34) | 0.87   |
| Juice or soda (vs 0-3 times/day)                        | 335 |                   |        |
| 4 times/day                                             |     | 1.38 (1.06, 1.79) | 0.02   |
| $\geq 5$ times/day                                      |     | 1.57 (1.25, 1.97) | <0.001 |
| Saliva flow rate (mL/min)                               | 333 | 0.80 (0.64, 0.98) | 0.03   |
| Percent teeth with visible plaque                       | 335 | 1.00 (0.99, 1.01) | 0.75   |
| Nadir CD4 cell count (vs $>350$ cells/mm <sup>3</sup> ) | 209 |                   |        |
| <200 cells/mm <sup>3</sup>                              |     | 1.72 (1.29, 2.28) | <0.001 |
| 200-350 cells/mm <sup>3</sup>                           |     | 1.48 (1.08, 2.02) | 0.01   |

|                                                         |     |                   |       |
|---------------------------------------------------------|-----|-------------------|-------|
| Current CD4 cell count (vs >350 cells/mm <sup>3</sup> ) | 209 |                   |       |
| <200 cells/mm <sup>3</sup>                              |     | 1.88 (1.22, 2.89) | 0.004 |
| 200-350 cells/mm <sup>3</sup>                           |     | 1.18 (0.80, 1.73) | 0.41  |
| Current HIV RNA load $\geq$ 400 copies/mL (vs <400)     | 207 | 1.27 (0.97, 1.66) | 0.08  |
| History of an AIDS-defining illness                     | 209 | 1.16 (0.88, 1.52) | 0.29  |

\*Overall adjusted mean ratio estimate was evaluated by combining the estimates from the zero-inflated portion and the negative-binomial portion of the ZINB model.
