**Supplemental Table 5.****Univariable ordinal logistic regression models of periodontal disease.**

| <b>Parameter</b>                    | <b>N</b> | <b>OR* (95% CI)</b> | <b>P-Value</b> |
|-------------------------------------|----------|---------------------|----------------|
| PHIV infection                      | 331      | 1.17 (0.77, 1.77)   | 0.47           |
| Age (vs <14 years)                  | 331      |                     |                |
| 14-16 years                         |          | 1.41 (0.83, 2.38)   | 0.20           |
| 17-18 years                         |          | 1.81 (1.01, 3.26)   | 0.05           |
| ≥19 years                           |          | 2.17 (1.15, 4.09)   | 0.02           |
| Female                              | 331      | 0.73 (0.49, 1.10)   | 0.13           |
| Black (vs non-black)                | 331      | 1.00 (0.66, 1.53)   | 0.99           |
| Hispanic (vs non-Hispanic)          | 331      | 0.97 (0.63, 1.49)   | 0.88           |
| Tanner stage (vs 1-3)               | 331      |                     |                |
| Stage 4                             |          | 1.14 (0.59, 2.18)   | 0.70           |
| Stage 5                             |          | 2.01 (1.17, 3.46)   | 0.01           |
| Caregiver is biological parent      | 331      | 0.87 (0.58, 1.30)   | 0.49           |
| Caregiver is high school graduate   | 328      | 1.18 (0.76, 1.85)   | 0.46           |
| Caregiver income <\$20,001 annually | 323      | 0.87 (0.58, 1.31)   | 0.49           |
| Reported ever having sex            | 325      | 1.73 (1.14, 2.63)   | 0.01           |
| Reported ever having oral sex       | 325      | 1.36 (0.89, 2.09)   | 0.16           |
| Drank alcohol in past 3 months      | 325      | 1.35 (0.83, 2.21)   | 0.23           |
| Smoked cigarettes in past 3 months  | 323      | 1.55 (0.75, 3.18)   | 0.24           |
| Used marijuana in past 3 months     | 325      | 1.30 (0.78, 2.18)   | 0.32           |

|                                                           |     |                   |       |
|-----------------------------------------------------------|-----|-------------------|-------|
| Brushed teeth (vs $\geq 2$ times/day)                     | 331 |                   |       |
| <1 time/day                                               |     | 1.10 (0.51, 2.37) | 0.80  |
| 1 time/day                                                |     | 1.05 (0.69, 1.61) | 0.82  |
| Flossed teeth (vs $\geq 2$ times/day)                     | 331 |                   |       |
| <1 time/day                                               |     | 1.14 (0.47, 2.72) | 0.78  |
| 1 time/day                                                |     | 1.68 (0.59, 4.81) | 0.33  |
| Have no regular source of dental care                     | 327 | 1.00 (0.61, 1.64) | 0.99  |
| Did not have teeth cleaned in past year                   | 330 | 0.84 (0.55, 1.28) | 0.42  |
| Meal or snack (vs 1-3 times/day)                          | 331 |                   |       |
| 4 times/day                                               |     | 0.74 (0.35, 1.54) | 0.42  |
| $\geq 5$ times/day                                        |     | 0.83 (0.44, 1.55) | 0.55  |
| Juice or soda (vs 0-3 times/day)                          | 331 |                   |       |
| 4 times/day                                               |     | 0.92 (0.52, 1.61) | 0.76  |
| $\geq 5$ times/day                                        |     | 1.30 (0.79, 2.14) | 0.30  |
| Saliva flow rate (mL/min)                                 | 329 | 1.44 (0.94, 2.21) | 0.10  |
| Percent teeth with visible plaque                         | 331 | 1.02 (1.01, 1.03) | <.001 |
| Nadir CD4 cell count (vs $>350$ cells/mm <sup>3</sup> )   | 205 |                   |       |
| <200 cells/mm <sup>3</sup>                                |     | 1.45 (0.80, 2.63) | 0.22  |
| 200-350 cells/mm <sup>3</sup>                             |     | 1.46 (0.76, 2.81) | 0.25  |
| Current CD4 cell count (vs $>350$ cells/mm <sup>3</sup> ) | 205 |                   |       |
| <200 cells/mm <sup>3</sup>                                |     | 0.57 (0.21, 1.59) | 0.28  |
| 200-350 cells/mm <sup>3</sup>                             |     | 1.19 (0.54, 2.66) | 0.67  |
| Current HIV RNA load $\geq 400$ copies/mL (vs             | 203 | 0.90 (0.52, 1.56) | 0.71  |

|                                     |     |                   |      |
|-------------------------------------|-----|-------------------|------|
| <400)                               |     |                   |      |
| History of an AIDS-defining illness | 205 | 1.42 (0.78, 2.59) | 0.25 |

\*Proportional odds of disease.
