# Supplementary material for: The Burden of Oral Disease among Perinatally HIV-Infected and HIV-Exposed Uninfected Youth
Source: PLOS journal article supplement (doi:10.1371/journal.pone.0156459), 2016-06-14
Supplement: S4 (10.1371/journal.pone.0156459.s004) [file journal.pone.0156459.s004]

**Supplemental Table 4.****Univariable zero-inflated negative binomial models of number of decayed teeth (DT).**

| <b>Parameter</b>                    | <b>N</b> | <b>aMR* (95% CI)</b> | <b>P-Value</b> |
|-------------------------------------|----------|----------------------|----------------|
| PHIV infection                      | 335      | 1.57 (1.12, 2.20)    | 0.009          |
| Age (vs <14 years)                  | 335      |                      |                |
| 14-16 years                         |          | 1.26 (0.82, 1.93)    | 0.30           |
| 17-18 years                         |          | 1.76 (1.11, 2.79)    | 0.02           |
| ≥19 years                           |          | 1.78 (1.08, 2.92)    | 0.02           |
| Female                              | 335      | 1.28 (0.93, 1.77)    | 0.14           |
| Black (vs non-black)                | 335      | 0.95 (0.67, 1.33)    | 0.75           |
| Hispanic (vs non-Hispanic)          | 335      | 1.16 (0.82, 1.64)    | 0.40           |
| Tanner stage (vs 1-3)               | 335      |                      |                |
| Stage 4                             |          | 1.21 (0.71, 2.05)    | 0.48           |
| Stage 5                             |          | 1.38 (0.89, 2.14)    | 0.15           |
| Caregiver is biological parent      | 335      | 0.92 (0.67, 1.28)    | 0.63           |
| Caregiver is high school graduate   | 332      | 0.60 (0.42, 0.85)    | 0.004          |
| Caregiver income <\$20,001 annually | 327      | 1.43 (1.03, 1.98)    | 0.03           |
| Reported ever having sex            | 328      | 1.20 (0.86, 1.67)    | 0.28           |
| Reported ever having oral sex       | 328      | 1.18 (0.84, 1.65)    | 0.34           |
| Drank alcohol in past 3 months      | 328      | 1.37 (0.93, 2.00)    | 0.11           |
| Smoked cigarettes in past 3 months  | 326      | 1.51 (0.87, 2.64)    | 0.14           |
| Used marijuana in past 3 months     | 328      | 1.50 (1.01, 2.25)    | 0.05           |

|                                                           |     |                   |       |
|-----------------------------------------------------------|-----|-------------------|-------|
| Brushed teeth (vs $\geq 2$ times/day)                     | 335 |                   |       |
| <1 time/day                                               |     | 0.85 (0.46, 1.57) | 0.60  |
| 1 time/day                                                |     | 0.82 (0.59, 1.16) | 0.27  |
| Flossed teeth <1 time/day (vs $\geq 1$ )                  | 335 | 1.18 (0.76, 1.84) | 0.47  |
| Have no regular source of dental care                     | 330 | 2.28 (1.58, 3.30) | <.001 |
| Did not have teeth cleaned in past year                   | 334 | 1.78 (1.28, 2.47) | <.001 |
| Meal or snack (vs 1-3 times/day)                          | 335 |                   |       |
| 4 times/day                                               |     | 1.32 (0.71, 2.46) | 0.38  |
| $\geq 5$ times/day                                        |     | 2.14 (1.26, 3.62) | 0.005 |
| Juice or soda (vs 0-3 times/day)                          | 335 |                   |       |
| 4 times/day                                               |     | 1.77 (1.15, 2.75) | 0.01  |
| $\geq 5$ times/day                                        |     | 1.74 (1.19, 2.55) | 0.005 |
| Saliva flow rate (mL/min)                                 | 333 | 1.00 (0.69, 1.44) | 0.99  |
| Percent teeth with visible plaque                         | 335 | 1.01 (1.00, 1.01) | 0.10  |
| Nadir CD4 cell count (vs $>350$ cells/mm <sup>3</sup> )   | 209 |                   |       |
| <200 cells/mm <sup>3</sup>                                |     | 2.17 (1.39, 3.40) | <.001 |
| 200-350 cells/mm <sup>3</sup>                             |     | 1.50 (0.90, 2.47) | 0.12  |
| Current CD4 cell count (vs $>350$ cells/mm <sup>3</sup> ) | 209 |                   |       |
| <200 cells/mm <sup>3</sup>                                |     | 3.01 (1.46, 6.19) | 0.003 |
| 200-350 cells/mm <sup>3</sup>                             |     | 1.68 (0.94, 3.00) | 0.08  |
| Current HIV RNA load $\geq 400$ copies/mL (vs <400)       | 207 | 1.65 (1.09, 2.50) | 0.02  |

|                                     |     |                   |      |
|-------------------------------------|-----|-------------------|------|
| History of an AIDS-defining illness | 209 | 1.42 (0.90, 2.24) | 0.13 |
|-------------------------------------|-----|-------------------|------|

\* Overall mean ratio was the same as the mean ratio from the negative binomial portion since the zero-inflated portion had intercept only for all characteristics except for saliva flow rate, for which the overall mean ratio estimate was evaluated by combining the estimates from the zero-inflated and negative binomial portion
